# Supplementary material
Source: Springer Nature journal article supplement (https://www.springermedizin.de/resource/supplementary/13063_2008_346_MOESM2_ESM.pdf/9618034)
Supplement: MOESM2 [file 9618034]

Meta-analyses and randomized controlled trials on perioperative management

| A. Bowel preparation                                                                                                                                                                                                 | Title and author | Comment                                                                                                                                                                                                                                                 |
|----------------------------------------------------------------------------------------------------------------------------------------------------------------------------------------------------------------------|------------------|---------------------------------------------------------------------------------------------------------------------------------------------------------------------------------------------------------------------------------------------------------|
| <i>Meta-analyses</i>                                                                                                                                                                                                 |                  |                                                                                                                                                                                                                                                         |
| Mechanical bowel preparation for elective colorectal surgery. Guenaga et al. 2005                                                                                                                                    |                  | 9 trials / 1592 patients included. Bowel preparation is associated with increased rates of anastomotic leakage (6.3 vs. 3.2%; p=0.003) and wound complications (7.4 vs. 5.4, not significant).                                                          |
| Meta-analysis of randomized clinical trials of colorectal surgery with or without mechanical bowel preparation. Slim et al. 2004                                                                                     |                  | 7 trials / 1454 patients included. Significantly more anastomotic leakage after mechanical bowel preparation (5.6 vs. 3.2%; p=0.032). No significant difference was found for wound infection, other septic complications and non-septic complications. |
| <i>RCTs</i>                                                                                                                                                                                                          |                  |                                                                                                                                                                                                                                                         |
| Mechanical bowel preparation for elective colorectal surgery: a multicentre randomised trial. Contant et al. 2007                                                                                                    |                  | 1431 patients / 13 centres included. No significant difference in anastomotic leakage, septic complications and mortality between bowel preparation and no bowel preparation but fewer abscesses after anastomotic leakage.                             |
| Multicentre randomized clinical trial of mechanical bowel preparation in elective colonic resection. Jung et al. 2007                                                                                                |                  | 1505 patients enrolled. No significant differences in overall complications.                                                                                                                                                                            |
| Mechanical bowel preparation for elective colorectal surgery with primary intraperitoneal anastomosis by a single surgeon: interim analysis of a prospective single-blinded randomized trial. Pena-Soria et al. 2007 |                  | 97 patients included. Same or worse outcomes after mechanical bowel preparation (Anastomotic failure: 8.3 vs. 4.1, not significant).                                                                                                                    |
| Mechanical bowel preparation or not? Outcome of a multicenter, randomized trial in elective open colon surgery. Fa-Si-Oen et al. 2005                                                                                |                  | 250 patients / centres included. No significant difference between groups.                                                                                                                                                                              |
| Randomized clinical trial of mechanical bowel preparation versus no preparation before elective left-sided colorectal surgery. Bucher et al. 2005                                                                    |                  | 135 patients included. No bowel preparation is associated with reduced postoperative morbidity (22 vs. 8%; p=0.028).                                                                                                                                    |
| Is mechanical bowel preparation mandatory for elective colon surgery? A prospective randomized study. Ram et al. 2005                                                                                                |                  | 329 patients included. No advantage of bowel preparation in elective colorectal surgery.                                                                                                                                                                |

| B. Incision               | Title and author                                                                                                                                                                                                   | Comment                                                                                                                                                                                |
|---------------------------|--------------------------------------------------------------------------------------------------------------------------------------------------------------------------------------------------------------------|----------------------------------------------------------------------------------------------------------------------------------------------------------------------------------------|
| <i>Meta-analyses</i>      |                                                                                                                                                                                                                    |                                                                                                                                                                                        |
|                           | Transverse verses midline incisions for abdominal surgery. Brown et al. 2005                                                                                                                                       | No difference in complication rates and recovery times.                                                                                                                                |
| <i>RCTs</i>               |                                                                                                                                                                                                                    |                                                                                                                                                                                        |
|                           | Randomized clinical trial of vertical or transverse laparotomy for abdominal aortic aneurysm repair. Fassiadis et al. 2005                                                                                         | 69 patients included. Incisional hernia is less frequent after transverse incision.                                                                                                    |
| <hr/>                     |                                                                                                                                                                                                                    |                                                                                                                                                                                        |
| C. Antibiotic prophylaxis | Title and author                                                                                                                                                                                                   | Comment                                                                                                                                                                                |
| <i>Meta-analyses</i>      |                                                                                                                                                                                                                    |                                                                                                                                                                                        |
|                           | Antimicrobial prophylaxis in colorectal surgery: a systematic review of randomized controlled trials. Song et al. 1998                                                                                             | 147 trials included. Antibiotic prophylaxis prevents surgical wound infection after colorectal surgery. Single-shot is as effective as long-term postoperative antibiotic prophylaxis. |
| <i>RCTs</i>               |                                                                                                                                                                                                                    |                                                                                                                                                                                        |
|                           | Randomized, multicenter trial of antibiotic prophylaxis in elective colorectal surgery: single dose vs 3 doses of a second-generation cephalosporin without metronidazole and oral antibiotics. Fujita et al. 2007 | 384 patients / 7 centres included. Antibiotic dose correlates to incidence of incisional surgical site infections.                                                                     |

| D. Abdominal drain                                                                                                                         | Title and author                                                                                                                                                                                                                                                                             | Comment |
|--------------------------------------------------------------------------------------------------------------------------------------------|----------------------------------------------------------------------------------------------------------------------------------------------------------------------------------------------------------------------------------------------------------------------------------------------|---------|
| <i>Meta-analyses</i>                                                                                                                       |                                                                                                                                                                                                                                                                                              |         |
| Routine abdominal drainage for uncomplicated liver resection. Gurusamy et al. 2007                                                         | 465 patients / 5 trials included. No significant difference between abdominal drainage vs. no drainage groups as far as mortality, intra-abdominal collections requiring re-operation, infected intra-abdominal collections, wound infection, ascitic leak, and hospital stay are concerned. |         |
| Evidence-based value of prophylactic drainage in gastrointestinal surgery: a systematic review and meta-analyses. Petrowsky et al. 2004    | 30 trials included. Prophylactic drainage is indicated after esophageal resection and total gastrectomy, but not after hepatic, rectal or colonic resection with primary anastomosis and appendectomy.                                                                                       |         |
| <i>RCTs</i>                                                                                                                                |                                                                                                                                                                                                                                                                                              |         |
| Prospective randomized clinical trial of the value of intraperitoneal drainage after pancreatic resection. Conlon 2001                     | 179 patients (40 patients receiving distal pancreatectomy) included. No reduction in complication or mortality. No reduced need for interventional drainages and surgical exploration after septic complications.                                                                            |         |
| Randomized clinical trial of the effects of abdominal drainage after elective hepatectomy using the crushing clamp method. Sun et al. 2006 | 120 patients included. Cirrhosis and abdominal drainage independently correlate to development of postoperative wound complications. No difference in length of hospitalisation.                                                                                                             |         |

| E. Pain management                                                                                                                                                                    | Title and author                                                                                                                                                                                                    | Comment |
|---------------------------------------------------------------------------------------------------------------------------------------------------------------------------------------|---------------------------------------------------------------------------------------------------------------------------------------------------------------------------------------------------------------------|---------|
| <i>Meta-analyses</i>                                                                                                                                                                  |                                                                                                                                                                                                                     |         |
| Meta-analysis of epidural analgesia versus parenteral opioid analgesia after colorectal surgery. Marret et al. 2007                                                                   | 16 trials included. No difference in length of hospitalisation.                                                                                                                                                     |         |
| Patient controlled intravenous opioid analgesia versus continuous epidural analgesia for pain after intra-abdominal surgery. Werawatganon et al. 2005                                 | 711 patients / 9 studies included. Continuous epidural analgesia is superior in relieving postoperative pain but associated with a higher incidence of pruritus.                                                    |         |
| Efficacy of postoperative patient-controlled and continuous infusion epidural analgesia versus intravenous patient-controlled analgesia with opioids: a meta-analysis. Wu et al. 2005 | Continuous epidural infusion significantly is superior in relieving overall pain; higher incidence of nausea/vomiting and motor block but lower incidence of pruritus.                                              |         |
| Epidural local anaesthetics versus opioid-based analgesic regimens on postoperative gastrointestinal paralysis, PONV and pain after abdominal surgery. Jørgensen et al. 2000          | Local anaesthetics decrease gastrointestinal paralysis with comparable postoperative pain relief compared to regimens using opioids.                                                                                |         |
| <i>RCTs</i>                                                                                                                                                                           |                                                                                                                                                                                                                     |         |
| Pain relief and safety after major surgery. A prospective study of epidural and intravenous analgesia in 2696 patients. Flisberg et al. 2003                                          | 2696 patients included. Less pain after epidural analgesia; opioid related side-effects more common with intravenous morphine analgesia.                                                                            |         |
| Comparison of intravenous or epidural patient-controlled analgesia in the elderly after major abdominal surgery. Mann et al. 2000                                                     | 70 patients included. Epidural patient controlled anaesthesia using local anaesthetics and an opioid provides better pain relief and improves mental status and bowel activity compared to intravenous application. |         |

| F. Gastric tube      | Title and author                                                                                                                           | Comment                                                                                                                                                   |
|----------------------|--------------------------------------------------------------------------------------------------------------------------------------------|-----------------------------------------------------------------------------------------------------------------------------------------------------------|
| <i>Meta-analyses</i> |                                                                                                                                            |                                                                                                                                                           |
|                      | Prophylactic nasogastric decompression after abdominal surgery. Nelson et al. 2007                                                         | 5240 patients / 33 trials included. Earlier return of bowel function, decreased pulmonary complications and shorter hospitalisation without gastric tube. |
|                      | Systematic review of prophylactic nasogastric decompression after abdominal operations. Nelson et al. 2005                                 | 4194 patients / 28 trials included. Earlier return of bowel function without gastric tube.                                                                |
| <i>RCTs</i>          |                                                                                                                                            |                                                                                                                                                           |
|                      | Randomized clinical trial evaluating the need for routine nasogastric decompression after elective hepatic resection. Pesseaux et al. 2007 | 200 patients included. No advantage but increased risk of pulmonary complications in nasogastric tube group.                                              |

| G. Postoperative feeding                                                                                                                            | Title and author | Comment                                                                                                                                                 |
|-----------------------------------------------------------------------------------------------------------------------------------------------------|------------------|---------------------------------------------------------------------------------------------------------------------------------------------------------|
| <i>Meta-analyses</i>                                                                                                                                |                  |                                                                                                                                                         |
| Early enteral nutrition within 24h of colorectal surgery versus later commencement of feeding for postoperative complications. Andersen et al. 2006 |                  | 1173 patients / 13 trials included. No significant advantage in keeping patients starved after gastrointestinal surgery.                                |
| <i>RCTs</i>                                                                                                                                         |                  |                                                                                                                                                         |
| Randomized clinical trial of the impact of early enteral feeding on postoperative ileus and recovery. Han-Geurts et al. 2007                        |                  | 128 patients included. No significant difference between early (median 2) vs. conventional (median 5) return to oral diet.                              |
| H. Patient mobilisation                                                                                                                             | Title and author | Comment                                                                                                                                                 |
| <i>RCTs</i>                                                                                                                                         |                  |                                                                                                                                                         |
| The quantity of early upright mobilisation performed following upper abdominal surgery is low: an observational study. Browning et al. 2007         |                  | 50 patients included. Increased early upright mobilisation may have positive effect on reduced length of hospitalisation.                               |
| Randomised clinical trial of physiotherapy after open abdominal surgery in high risk patients. Mackay et al. 2005                                   |                  | 56 patients included. In high risk patients, deep breathing and coughing exercises do not significantly decrease postoperative pulmonary complications. |
| Randomized controlled trial of prophylactic chest physiotherapy in major abdominal surgery. Fagevik et al. 1997                                     |                  | 366 patients included. Preoperative chest physiotherapy significantly decreased postoperative pulmonary complications and improved mobilisation.        |

| I. Somatostatin                                                                                                                                                                                   | Title and author                    | Comment                                                                                                                                             |
|---------------------------------------------------------------------------------------------------------------------------------------------------------------------------------------------------|-------------------------------------|-----------------------------------------------------------------------------------------------------------------------------------------------------|
| Meta-analyses                                                                                                                                                                                     |                                     |                                                                                                                                                     |
| Use of octreotide for the prevention of pancreatic fistula after elective pancreatic surgery: a systematic review and meta-analysis. Alghamdi et al. 2007                                         | 1359 patients / 7 trials included.  | Somatostatin significantly reduces incidence of pancreatic fistula after elective pancreatic surgery. No significant difference in mortality rates. |
| Efficacy of somatostatin and its analogues in prevention of postoperative complications after pancreaticoduodenectomy: a meta-analysis of randomized controlled trials. Zeng et al. 2008          | 8 studies included.                 | Somatostatin does not significantly reduce postoperative complications after pancreaticoduodenectomy.                                               |
| Meta-analysis of the value of somatostatin and its analogues in reducing complications associated with pancreatic surgery. Connor et al. 2005                                                     | 1918 patients / 10 trials included. | Somatostatin reduces postoperative complications but not mortality.                                                                                 |
| RCTs                                                                                                                                                                                              |                                     |                                                                                                                                                     |
| Prospectively randomized trial using perioperative low-dose octreotide to prevent organ-related and general complications after pancreatic surgery and pancreatico-jejunostomy. Hesse et al. 2005 | 105 patients included.              | No significant difference in occurrence of pancreatic fistula and overall morbidity and mortality in somatostatin vs. no somatostatin group.        |
| Effects of somatostatin prophylaxis after pylorus-preserving pancreaticoduodenectomy: increased delayed gastric emptying and reduced plasma motilin. Shan et al. 2005                             | 23 patients included.               | Delayed gastric emptying more frequent after somatostatin prophylaxis.                                                                              |
| Somatostatin analogues in the prevention of pancreas-related complications after pancreatic resection. Ramos-De la Medina et al. 2006                                                             | 381 patients included.              | No benefit of perioperative somatostatin administration.                                                                                            |
